# Supplementary material
Source: ML conference proceedings conference paper supplement (https://proceedings.mlr.press/v89/liang19a.html)
Supplement: Supplementary file [file liang19a-supp.pdf]

## A Proofs

*Proof of Lemma 2.1.* Recall the property of the activation function  $\sigma(z) = \sigma'(z)z$ . Let us prove for any  $0 \leq t \leq s \leq L$ , and any  $l \in [k_{s+1}]$

$$\sum_{i \in [k_t], j \in [k_{t+1}]} \frac{\partial O_l^{s+1}}{\partial W_{ij}^t} W_{ij}^t = O_l^{s+1}(x). \quad (\text{A.1})$$

We prove this statement via induction on the non-negative gap  $s - t$ . Starting with  $s - t = 0$ , we have

$$\begin{aligned} \frac{\partial O_l^{t+1}}{\partial W_{il}^t} &= \frac{\partial O_l^{t+1}}{\partial N_l^{t+1}} \frac{\partial N_l^{t+1}}{\partial W_{il}^t} = \sigma'(N_l^{t+1}(x)) O_l^t(x), \\ \frac{\partial O_l^{t+1}}{\partial W_{ij}^t} &= 0, \quad \text{for } j \neq l, \end{aligned}$$

and, therefore,

$$\sum_{i \in [k_t], j \in [k_{t+1}]} \frac{\partial O_l^{t+1}}{\partial W_{ij}^t} W_{ij}^t = \sum_{i \in [k_t]} \sigma'(N_l^{t+1}(x)) O_l^t(x) W_{il}^t = \sigma'(N_l^{t+1}(x)) N_l^{t+1}(x) = O_l^{t+1}(x). \quad (\text{A.2})$$

This solves the base case when  $s - t = 0$ .

Let us assume for general  $s - t \leq h$  the induction hypothesis ( $h \geq 0$ ), and let us prove it for  $s - t = h + 1$ . Due to chain-rule in the back-propagation updates

$$\frac{\partial O_l^{s+1}}{\partial W_{ij}^t} = \frac{\partial O_l^{s+1}}{\partial N_l^{s+1}} \sum_{k \in [k_s]} \frac{\partial N_l^{s+1}}{\partial O_k^s} \frac{\partial O_k^s}{\partial W_{ij}^t}. \quad (\text{A.3})$$

Using the induction on  $\frac{\partial O_k^s}{\partial W_{ij}^t}$  as  $(s - 1) - t = h$

$$\sum_{i \in [k_t], j \in [k_{t+1}]} \frac{\partial O_k^s}{\partial W_{ij}^t} W_{ij}^t = O_k^s(x), \quad (\text{A.4})$$

and, therefore,

$$\begin{aligned} & \sum_{i \in [k_t], j \in [k_{t+1}]} \frac{\partial O_l^{s+1}}{\partial W_{ij}^t} W_{ij}^t \\ &= \sum_{i \in [k_t], j \in [k_{t+1}]} \frac{\partial O_l^{s+1}}{\partial N_l^{s+1}} \sum_{k \in [k_s]} \frac{\partial N_l^{s+1}}{\partial O_k^s} \frac{\partial O_k^s}{\partial W_{ij}^t} W_{ij}^t \\ &= \frac{\partial O_l^{s+1}}{\partial N_l^{s+1}} \sum_{k \in [k_s]} \frac{\partial N_l^{s+1}}{\partial O_k^s} \sum_{i \in [k_t], j \in [k_{t+1}]} \frac{\partial O_k^s}{\partial W_{ij}^t} W_{ij}^t \\ &= \sigma'(N_l^{s+1}(x)) \sum_{k \in [k_s]} W_{kl}^s O_k^s(x) = O_l^{s+1}(x). \end{aligned}$$

This completes the induction argument. In other words, we have proved for any  $t, s$  that  $t \leq s$ , and  $l$  is any hidden unit in layer  $s$

$$\sum_{i, j \in \dim(W^t)} \frac{\partial O_l^{s+1}}{\partial W_{ij}^t} W_{ij}^t = O_l^{s+1}(x). \quad (\text{A.5})$$

Remark that in the case when there are hard-coded zero weights, the proof still goes through exactly. The reason is, for the base case  $s = t$ ,

$$\sum_{i \in [k_t], j \in [k_{t+1}]} \frac{\partial O_l^{t+1}}{\partial W_{ij}^t} W_{ij}^t = \sum_{i \in [k_t]} \sigma'(N_l^{t+1}(x)) O_l^t(x) W_{il}^t \mathbf{1}(W_{il}^t \neq 0) = \sigma'(N_l^{t+1}(x)) N_l^{t+1}(x) = O_l^{t+1}(x).$$

and for the induction step,

$$\sum_{i \in [k_t], j \in [k_{t+1}]} \frac{\partial O_i^{s+1}}{\partial W_{ij}^t} W_{ij}^t = \sigma'(N_i^{s+1}(x)) \sum_{k \in [k_s]} W_{kl}^s O_k^s(x) \mathbf{1}(W_{kl}^s \neq 0) = O_i^{s+1}(x).$$

□

*Proof of Corollary 2.1.* Observe that  $\partial \ell(f, Y) / \partial f = -y$  if  $yf < 1$ , and  $\partial \ell(f, Y) / \partial f = 0$  if  $yf \geq 1$ . When the output layer has only one unit, we find

$$\langle \nabla_{\theta} \widehat{L}(\theta), \theta \rangle = (L+1) \widehat{\mathbb{E}} \left[ \frac{\partial \ell(f_{\theta}(X), Y)}{\partial f_{\theta}(X)} f_{\theta}(X) \right] = (L+1) \widehat{\mathbb{E}} \left[ -Y f_{\theta}(X) \mathbf{1}_{Y f_{\theta}(X) < 1} \right].$$

For a stationary point  $\theta$ , we have  $\nabla_{\theta} \widehat{L}(\theta) = \mathbf{0}$ , which implies the LHS of the above equation is 0. Now recall that the second condition that  $\theta$  separates the data implies  $-Y f_{\theta}(X) < 0$  for any point in the data set. In this case, the RHS equals zero if and only if  $Y f_{\theta}(X) \geq 1$ . □

*Proof of Corollary 2.2.* The proof follows from applying Lemma 2.1

$$0 = \theta^T \nabla_{\theta} \widehat{L}(\theta) = (L+1) \widehat{\mathbb{E}} \left[ \left( Y - X^T \prod_{t=0}^L W^t \right) X^T \prod_{t=0}^L W^t \right],$$

which means  $\langle w(\theta), \mathbf{X}^T \mathbf{X} w(\theta) - \mathbf{X}^T \mathbf{Y} \rangle = 0$ . □

*Proof of Theorem 3.2 (spectral norm).* The proof follows from a peeling argument from the right hand side. Recall that  $O^t \in \mathbb{R}^{1 \times k_t}$ ,  $W^L \in \mathbb{R}^{k_L \times 1}$  and  $|O^L W^L| \leq \|W^L\|_{\sigma} \|O^L\|_2$  so one has

$$\begin{aligned} \frac{1}{(L+1)^2} \|\theta\|_{\text{fr}}^2 &= \mathbb{E} [ |O^L W^L D^{L+1}|^2 ] \\ &\leq \mathbb{E} [ \|W^L\|_{\sigma}^2 \cdot \|O^L\|_2^2 \cdot |D^{L+1}(X)|^2 ] \\ &= \mathbb{E} [ |D^{L+1}(X)|^2 \cdot \|W^L\|_{\sigma}^2 \cdot \|O^{L-1} W^{L-1} D^L\|_2^2 ] \\ &\leq \mathbb{E} [ |D^{L+1}(X)|^2 \cdot \|W^L\|_{\sigma}^2 \cdot \|O^{L-1} W^{L-1}\|_2^2 \cdot \|D^L\|_{\sigma}^2 ] \\ &\leq \mathbb{E} [ \|D^L\|_{\sigma}^2 |D^{L+1}(X)|^2 \cdot \|W^L\|_{\sigma}^2 \|W^{L-1}\|_{\sigma}^2 \cdot \|O^{L-1}\|_2^2 ] \\ &\leq \mathbb{E} [ \|D^L\|_{\sigma}^2 \|D^{L+1}(X)\|_{\sigma}^2 \|O^{L-1}\|_2^2 \cdot \|W^{L-1}\|_{\sigma}^2 \|W^L\|_{\sigma}^2 ] \\ &\dots \text{ repeat the process to bound } \|O^{L-1}\|_2 \\ &\leq \mathbb{E} \left( \|X\|_2^2 \prod_{t=1}^{L+1} \|D^t(X)\|_{\sigma}^2 \right) \prod_{t=0}^L \|W^t\|_{\sigma}^2 = \|\theta\|_{\sigma}^2. \end{aligned}$$

□

*Proof of Theorem 3.2 (group norm).* The proof still follows a peeling argument from the right. We have

$$\begin{aligned} \frac{1}{(L+1)^2} \|\theta\|_{\text{fr}}^2 &= \mathbb{E} [ |O^L W^L D^{L+1}|^2 ] \\ &\leq \mathbb{E} [ \|W^L\|_{p,q}^2 \cdot \|O^L\|_{p^*}^2 \cdot |D^{L+1}(X)|^2 ] \quad \text{use (A.6)} \\ &= \mathbb{E} [ |D^{L+1}(X)|^2 \cdot \|W^L\|_{p,q}^2 \cdot \|O^{L-1} W^{L-1} D^L\|_{p^*}^2 ] \\ &\leq \mathbb{E} [ |D^{L+1}(X)|^2 \cdot \|W^L\|_{p,q}^2 \cdot \|O^{L-1} W^{L-1}\|_q^2 \cdot \|D^L\|_{q \rightarrow p^*}^2 ] \\ &\leq \mathbb{E} [ \|D^L\|_{q \rightarrow p^*}^2 \|D^{L+1}(X)\|_{p,q}^2 \cdot \|W^L\|_{p,q}^2 \|W^{L-1}\|_{p,q}^2 \cdot \|O^{L-1}\|_{p^*}^2 ] \quad \text{use (A.8)} \\ &= \mathbb{E} [ \|D^L\|_{q \rightarrow p^*}^2 \|D^{L+1}(X)\|_{p,q}^2 \cdot \|O^{L-1}\|_{p^*}^2 \cdot \|W^{L-1}\|_{p,q}^2 \|W^L\|_{p,q}^2 ] \\ &\leq \dots \text{ repeat the process to bound } \|O^{L-1}\|_{p^*} \\ &\leq \mathbb{E} \left( \|X\|_{p^*}^2 \prod_{t=1}^{L+1} \|D^t(X)\|_{q \rightarrow p^*}^2 \right) \prod_{t=0}^L \|W^t\|_{p,q}^2 = \|\theta\|_{p,q}^2 \end{aligned}$$

In the proof of the first inequality we used Holder's inequality

$$\langle w, v \rangle \leq \|w\|_p \|v\|_{p^*} \quad (\text{A.6})$$

where  $\frac{1}{p} + \frac{1}{p^*} = 1$ . Let's prove for  $v \in \mathbb{R}^n$ ,  $M \in \mathbb{R}^{n \times m}$ , we have

$$\|v^T M\|_q \leq \|v\|_{p^*} \|M\|_{p,q}. \quad (\text{A.7})$$

Denote each column of  $M$  as  $M_{\cdot j}$ , for  $1 \leq j \leq m$ ,

$$\|v^T M\|_q = \left( \sum_{j=1}^m |v^T M_{\cdot j}|^q \right)^{1/q} \leq \left( \sum_{j=1}^m \|v\|_{p^*}^q \|M_{\cdot j}\|_p^q \right)^{1/q} = \|v\|_{p^*} \|M\|_{p,q}. \quad (\text{A.8})$$

□

*Proof of Theorem 3.2 (path norm).* The proof is due to Holder's inequality. For any  $x \in \mathbb{R}^p$

$$\begin{aligned} & \left| \sum_{i_0, i_1, \dots, i_L} x_{i_0} W_{i_0 i_1}^0 D_{i_1}^1(x) W_{i_1 i_2}^1 \cdots D_{i_L}^L(x) W_{i_L}^L D^{L+1}(x) \right| \\ & \leq \left( \sum_{i_0, i_1, \dots, i_L} |x_{i_0} D_{i_1}^1(x) \cdots D_{i_L}^L(x) D^{L+1}(x)|^{q^*} \right)^{1/q^*} \cdot \left( \sum_{i_0, i_1, \dots, i_L} |W_{i_0 i_1}^0 W_{i_1 i_2}^1 W_{i_2 i_3}^2 \cdots W_{i_L}^L|^q \right)^{1/q}. \end{aligned}$$

Therefore we have

$$\begin{aligned} \frac{1}{(L+1)^2} \|\theta\|_{\text{fr}}^2 &= \mathbb{E} \left| \sum_{i_0, i_1, \dots, i_L} X_{i_0} W_{i_0 i_1}^0 D_{i_1}^1(X) W_{i_1 i_2}^1 \cdots W_{i_L}^L D_{i_L}^{L+1}(X) \right|^2 \\ &\leq \left( \sum_{i_0, i_1, \dots, i_L} |W_{i_0 i_1}^0 W_{i_1 i_2}^1 W_{i_2 i_3}^2 \cdots W_{i_L}^L|^q \right)^{2/q} \cdot \mathbb{E} \left( \sum_{i_0, i_1, \dots, i_L} |X_{i_0} D_{i_1}^1(X) \cdots D_{i_L}^L(X) D^{L+1}(X)|^{q^*} \right)^{2/q^*}, \end{aligned}$$

which gives

$$\frac{1}{L+1} \|\theta\|_{\text{fr}} \leq \left[ \mathbb{E} \left( \sum_{i_0, i_1, \dots, i_L} |X_{i_0} \prod_{t=1}^{L+1} D_{i_t}^t(X)|^{q^*} \right)^{2/q^*} \right]^{1/2} \cdot \left( \sum_{i_0, i_1, \dots, i_L} \prod_{t=0}^L |W_{i_t i_{t+1}}^t|^q \right)^{1/q} = \|\pi(\theta)\|_q.$$

□

*Proof of Theorem 3.2 (matrix-induced norm).* The proof follows from the recursive use of the inequality,

$$\|M\|_{p \rightarrow q} \|v\|_p \geq \|v^T M\|_q.$$

We have

$$\begin{aligned} \|\theta\|_{\text{fr}}^2 &= \mathbb{E} [|O^L W^L D^{L+1}|^2] \\ &\leq \mathbb{E} [\|W^L\|_{p \rightarrow q}^2 \cdot \|O^L\|_p^2 \cdot |D^{L+1}(X)|^2] \\ &\leq \mathbb{E} [|D^{L+1}(X)|^2 \cdot \|W^L\|_{p \rightarrow q}^2 \cdot \|O^{L-1} W^{L-1} D^L\|_p^2] \\ &\leq \mathbb{E} [|D^{L+1}(X)|^2 \cdot \|W^L\|_{p \rightarrow q}^2 \cdot \|O^{L-1} W^{L-1}\|_q^2 \cdot \|D^L\|_{q \rightarrow p}^2] \\ &\leq \mathbb{E} [\|D^L\|_{q \rightarrow p}^2 \|D^{L+1}(X)\|_{q \rightarrow p}^2 \cdot \|W^L\|_{p \rightarrow q}^2 \|W^{L-1}\|_{p \rightarrow q}^2 \cdot \|O^{L-1}\|_p^2] \\ &\leq \dots \text{ repeat the process to bound } \|O^{L-1}\|_p \\ &\leq \mathbb{E} \left( \|X\|_p^2 \prod_{t=1}^{L+1} \|D^t(X)\|_{q \rightarrow p}^2 \right) \prod_{t=0}^L \|W^t\|_{p \rightarrow q}^2 = \|\theta\|_{p \rightarrow q}^2, \end{aligned}$$

where third to last line is because  $D^{L+1}(X) \in \mathbb{R}^1$ ,  $|D^{L+1}(X)| = \|D^{L+1}(X)\|_{q \rightarrow p}$ .

□

*Proof of Theorem 3.2 (chain of induced norm).* The proof follows from a different strategy of peeling the terms from the right hand side, as follows,

$$\begin{aligned}
 \|\theta\|_{\text{fr}}^2 &= \mathbb{E} [|O^L W^L D^{L+1}|^2] \\
 &\leq \mathbb{E} \left[ \|W^L\|_{p_L \rightarrow p_{L+1}}^2 \cdot \|O^L\|_{p_L}^2 \cdot |D^{L+1}(X)|^2 \right] \\
 &\leq \mathbb{E} \left[ |D^{L+1}(X)|^2 \cdot \|W^L\|_{p_L \rightarrow p_{L+1}}^2 \cdot \|O^{L-1} W^{L-1} D^L\|_{p_L}^2 \right] \\
 &\leq \mathbb{E} \left[ |D^{L+1}(X)|^2 \cdot \|W^L\|_{p_L \rightarrow p_{L+1}}^2 \cdot \|O^{L-1} W^{L-1}\|_{p_L} \|D^L\|_{p_L \rightarrow p_L}^2 \right] \\
 &\leq \mathbb{E} \left[ \|D^L\|_{p_L \rightarrow p_L}^2 |D^{L+1}(X)|^2 \cdot \|W^L\|_{p_L \rightarrow p_{L+1}}^2 \|W^{L-1}\|_{p_{L-1} \rightarrow p_L}^2 \cdot \|O^{L-1}\|_{p_{L-1}}^2 \right] \\
 &\leq \mathbb{E} \left( \|X\|_{p_0}^2 \prod_{t=1}^{L+1} \|D^t(X)\|_{p_t \rightarrow p_t}^2 \right) \prod_{t=0}^L \|W^t\|_{p_t \rightarrow p_{t+1}}^2 = \|\theta\|_P^2.
 \end{aligned}$$

□

*Proof of Lemma 4.1.*

$$\begin{aligned}
 \frac{d}{dr} \|r\theta\|_{\text{fr}}^2 &= \mathbb{E} [2\langle \theta, \nabla_{\theta} f_{r\theta}(X) \rangle f_{r\theta}(X)] \\
 &= \mathbb{E} \left[ \frac{2(L+1)}{r} f_{r\theta}(X) f_{r\theta}(X) \right] \quad \text{use Lemma 2.1} \\
 &= \frac{2(L+1)}{r} \|r\theta\|_{\text{fr}}^2
 \end{aligned}$$

The last claim can be proved through solving the simple ODE. □

*Proof of Lemma 4.2.* Let us first construct  $\theta' \in \Theta_{L+1}$  that realizes  $\lambda f_{\theta_1} + (1-\lambda)f_{\theta_2}$ . The idea is very simple: we put  $\theta_1$  and  $\theta_2$  networks side-by-side, then construct an additional output layer with weights  $\lambda, 1-\lambda$  on the output of  $f_{\theta_1}$  and  $f_{\theta_2}$ , and the final output layer is passed through  $\sigma(x) = x$ . One can easily see that our key Lemma 2.1 still holds for this network: the interaction weights between  $f_{\theta_1}$  and  $f_{\theta_2}$  are always hard-coded as 0. Therefore we have constructed a  $\theta' \in \Theta_{L+1}$  that realizes  $\lambda f_{\theta_1} + (1-\lambda)f_{\theta_2}$ .

Now recall that

$$\begin{aligned}
 \frac{1}{L+2} \|\theta'\|_{\text{fr}} &= (\mathbb{E} f_{\theta'}^2)^{1/2} \\
 &= (\mathbb{E} (\lambda f_{\theta_1} + (1-\lambda)f_{\theta_2})^2)^{1/2} \\
 &\leq \lambda (\mathbb{E} f_{\theta_1}^2)^{1/2} + (1-\lambda) (\mathbb{E} f_{\theta_2}^2)^{1/2} \leq 1
 \end{aligned}$$

because  $\mathbb{E}[f_{\theta_1} f_{\theta_2}] \leq (\mathbb{E} f_{\theta_1}^2)^{1/2} (\mathbb{E} f_{\theta_2}^2)^{1/2}$ . □

*Proof of Theorem 4.1.* Due to Eqn. (3.2), one has

$$\begin{aligned}
 \frac{1}{(L+1)^2} \|\theta\|_{\text{fr}}^2 &= \mathbb{E} [v(\theta, X)^T X X^T v(\theta, X)] \\
 &= v(\theta)^T \mathbb{E} [X X^T] v(\theta)
 \end{aligned}$$

because in the linear case  $v(\theta, X) = W^0 D^1(x) W^1 D^2(x) \cdots D^L(x) W^L D^{L+1}(x) = \prod_{t=0}^L W^t =: v(\theta) \in \mathbb{R}^P$ . There-

fore

$$\begin{aligned}
 \mathcal{R}_N(B_{\text{fr}}(\gamma)) &= \mathbb{E} \sup_{\epsilon} \sup_{\theta \in B_{\text{fr}}(\gamma)} \frac{1}{N} \sum_{i=1}^N \epsilon_i f_{\theta}(X_i) \\
 &= \mathbb{E} \sup_{\epsilon} \sup_{\theta \in B_{\text{fr}}(\gamma)} \frac{1}{N} \sum_{i=1}^N \epsilon_i X_i^T v(\theta) \\
 &= \mathbb{E} \sup_{\epsilon} \sup_{\theta \in B_{\text{fr}}(\gamma)} \frac{1}{N} \left\langle \sum_{i=1}^N \epsilon_i X_i, v(\theta) \right\rangle \\
 &\leq \gamma \mathbb{E} \frac{1}{\epsilon} \left\| \sum_{i=1}^N \epsilon_i X_i \right\|_{[\mathbb{E}(X X^T)]^{-1}} \\
 &\leq \gamma \frac{1}{\sqrt{N}} \sqrt{\frac{1}{N} \mathbb{E} \left\| \sum_{i=1}^N \epsilon_i X_i \right\|_{[\mathbb{E}(X X^T)]^{-1}}^2} \\
 &= \gamma \frac{1}{\sqrt{N}} \sqrt{\left\langle \frac{1}{N} \sum_{i=1}^N X_i X_i^T, [\mathbb{E}(X X^T)]^{-1} \right\rangle}.
 \end{aligned}$$

Therefore

$$\mathbb{E} \mathcal{R}_N(B_{\text{fr}}(\gamma)) \leq \gamma \frac{1}{\sqrt{N}} \sqrt{\mathbb{E} \left\langle \frac{1}{N} \sum_{i=1}^N X_i X_i^T, [\mathbb{E}(X X^T)]^{-1} \right\rangle} = \gamma \sqrt{\frac{p}{N}}.$$

□

*Proof of Proposition 4.1.* If  $\mathcal{G} \subseteq \mathcal{F}$  then one has the lower bound  $\mathcal{R}_N(\mathcal{G}) \leq \mathcal{R}_N(\mathcal{F})$  on the empirical Rademacher complexity of  $\mathcal{F}$ . One can also obtain an upper bound by examining how the sub-space of functions  $\mathcal{G}$  approximates  $\mathcal{F}$ . For each  $f \in \mathcal{F}$  consider the closest point  $g_f \in \mathcal{G}$  to  $f$ ,

$$g_f := \arg \min_{g \in \mathcal{F}_{\sigma}} \|f - g\|_{\infty}.$$

Then the empirical Rademacher complexity  $\mathcal{R}_N(\mathcal{F})$  is upper-bounded in terms of  $\mathcal{R}_N(\mathcal{G})$  by

$$\begin{aligned}
 \mathcal{R}_N(\mathcal{F}) &= \mathbb{E} \sup_{\epsilon} \sup_{f \in \mathcal{F}} \frac{1}{N} \sum_{i=1}^N \epsilon_i f(X_i), \\
 &\leq \mathbb{E} \sup_{\epsilon} \sup_{f \in \mathcal{F}} \frac{1}{N} \sum_{i=1}^N \epsilon_i [f(X_i) - g_f(X_i)] + \mathcal{R}_N(\mathcal{G}), \\
 &\leq \sup_{f \in \mathcal{F}} \inf_{g \in \mathcal{G}} \|f - g\|_{\infty} + \mathcal{R}_N(\mathcal{G}).
 \end{aligned}$$

Therefore, taking expectation values over the data gives,

$$\mathbb{E} \mathcal{R}_N(\mathcal{F}) \leq \sup_{f \in \mathcal{F}} \inf_{g \in \mathcal{G}} \|f - g\|_{\infty} + \mathbb{E} \mathcal{R}_N(\mathcal{G}).$$

Setting  $\mathcal{F} = \mathcal{F}_{\text{fr}}(1)$  without loss of generality, we obtain the required result by appropriate choice of  $\mathcal{G} \subseteq \mathcal{F}_{\text{fr}}(1)$ .

Setting  $\mathcal{G} = \mathcal{F}_{\sigma}(r)$  with  $r = 1/[\widehat{\mathbb{E}}\|X\|^2]^{1/2}$  gives (Remark 4.1, Theorem 1.1 in [3]),

$$\mathbb{E} \mathcal{R}_N(\mathcal{F}_{\text{fr}}(1)) \leq \sup_{f \in \mathcal{F}_{\text{fr}}(1)} \inf_{g \in \mathcal{F}_{\sigma}(r)} \|f - g\|_{\infty} + \frac{\text{Polylog}}{\sqrt{N}}.$$

Setting  $\mathcal{G} = \mathcal{F}_{p,q}(r)$  with  $r = 1/(k^{[1/p^* - 1/q]_+})^L \max_i \|X_i\|_{p^*}$  gives (Remark 4.2, Theorem 1 in [15])

$$\mathbb{E} \mathcal{R}_N(\mathcal{F}_{\text{fr}}(1)) \leq \sup_{f \in \mathcal{F}_{\text{fr}}(1)} \inf_{g \in \mathcal{F}_{p,q}(r)} \|f - g\|_{\infty} + \frac{2^L \text{Polylog}}{\sqrt{N}}.$$

Setting  $\mathcal{G} = \mathcal{F}_{\pi,1}(r)$  with  $r = 1/\max_i \|X_i\|_\infty$  gives (Remark 4.3, Corollary in [15])

$$\mathbb{E} \mathcal{R}_N(\mathcal{F}_{\text{fr}}(1)) \leq \sup_{f \in \mathcal{F}_{\text{fr}}(1)} \inf_{g \in \mathcal{F}_{\pi,1}(r)} \|f - g\|_\infty + \frac{2^L \text{Polylog}}{\sqrt{N}}.$$

In all cases data-dependent pre-factors exactly cancel out and moreover the first term is in function space, not in parameter space.  $\square$

### A.1 Invariance of natural gradient

Consider the continuous-time analog of natural gradient flow,

$$d\theta_t = -\mathbf{I}(\theta_t)^{-1} \nabla_\theta L(\theta_t) dt, \quad (\text{A.9})$$

where  $\theta \in \mathbb{R}^p$ . Consider a differentiable transformation from one parametrization to another  $\theta \mapsto \xi \in \mathbb{R}^q$  denoted by  $\xi(\theta) : \mathbb{R}^p \rightarrow \mathbb{R}^q$ . Denote the Jacobian  $\mathbf{J}_\xi(\theta) = \frac{\partial(\xi_1, \xi_2, \dots, \xi_q)}{\partial(\theta_1, \theta_2, \dots, \theta_p)} \in \mathbb{R}^{q \times p}$ . Define the loss function  $\tilde{L} : \xi \rightarrow \mathbb{R}$  that satisfies

$$L(\theta) = \tilde{L}(\xi(\theta)) = \tilde{L} \circ \xi(\theta),$$

and denote  $\tilde{\mathbf{I}}(\xi)$  as the Fisher Information on  $\xi$  associated with  $\tilde{L}$ . Consider also the natural gradient flow on the  $\xi$  parametrization,

$$d\xi_t = -\tilde{\mathbf{I}}(\xi_t)^{-1} \nabla_\xi \tilde{L}(\xi_t) dt. \quad (\text{A.10})$$

Intuitively, one can show that the natural gradient flow is “invariant” to the specific parametrization of the problem.

**Lemma A.1** (Parametrization invariance). *Denote  $\theta \in \mathbb{R}^p$ , and the differentiable transformation from one parametrization to another  $\theta \mapsto \xi \in \mathbb{R}^q$  as  $\xi(\theta) : \mathbb{R}^p \rightarrow \mathbb{R}^q$ . Assume  $\mathbf{I}(\theta)$ ,  $\tilde{\mathbf{I}}(\xi)$  are invertible, and consider two natural gradient flows  $\{\theta_t, t > 0\}$  and  $\{\xi_t, t > 0\}$  defined in Eqn. (A.9) and (A.10) on  $\theta$  and  $\xi$  respectively.*

(1) *Re-parametrization: if  $q = p$ , and assume  $\mathbf{J}_\xi(\theta)$  is invertible, then natural gradient flow on the two parametrizations satisfies,*

$$\xi(\theta_t) = \xi_t, \quad \forall t,$$

*if the initial locations  $\theta_0, \xi_0$  are equivalent in the sense  $\xi(\theta_0) = \xi_0$ .*

(2) *Over-parametrization: If  $q > p$  and  $\xi_t = \xi(\theta_t)$  at some fixed time  $t$ , then the infinitesimal change satisfies*

$$\xi(\theta_{t+dt}) - \xi(\theta_t) = M_t(\xi_{t+dt} - \xi_t), \quad M_t \text{ has eigenvalues either } 0 \text{ or } 1$$

*where  $M_t = \mathbf{I}(\xi_t)^{-1/2}(I_q - U_\perp U_\perp^T)\mathbf{I}(\xi_t)^{1/2}$ , and  $U_\perp$  denotes the null space of  $\mathbf{I}(\xi)^{1/2}\mathbf{J}_\xi(\theta)$ .*

*Proof of Lemma A.1.* From basic calculus, one has

$$\begin{aligned} \nabla_\theta L(\theta) &= \mathbf{J}_\xi(\theta)^T \nabla_\xi \tilde{L}(\xi) \\ \mathbf{I}(\theta) &= \mathbf{J}_\xi(\theta)^T \tilde{\mathbf{I}}(\xi) \mathbf{J}_\xi(\theta) \end{aligned}$$

Therefore, plugging in the above expression into the natural gradient flow in  $\theta$

$$\begin{aligned} d\theta_t &= -\mathbf{I}(\theta_t)^{-1} \nabla_\theta L(\theta_t) dt \\ &= -[\mathbf{J}_\xi(\theta_t)^T \tilde{\mathbf{I}}(\xi(\theta_t)) \mathbf{J}_\xi(\theta_t)]^{-1} \mathbf{J}_\xi(\theta_t)^T \nabla_\xi \tilde{L}(\xi(\theta_t)) dt. \end{aligned}$$

In the re-parametrization case,  $\mathbf{J}_\xi(\theta)$  is invertible, and assuming  $\xi_t = \xi(\theta_t)$ ,

$$\begin{aligned} d\theta_t &= -[\mathbf{J}_\xi(\theta_t)^T \tilde{\mathbf{I}}(\xi(\theta_t)) \mathbf{J}_\xi(\theta_t)]^{-1} \mathbf{J}_\xi(\theta_t)^T \nabla_\xi \tilde{L}(\xi(\theta_t)) dt \\ &= -\mathbf{J}_\xi(\theta_t)^{-1} \tilde{\mathbf{I}}(\xi(\theta_t))^{-1} \nabla_\xi \tilde{L}(\xi(\theta_t)) dt \\ \mathbf{J}_\xi(\theta_t) d\theta_t &= -\tilde{\mathbf{I}}(\xi(\theta_t))^{-1} \nabla_\xi \tilde{L}(\xi(\theta_t)) dt \\ d\xi(\theta_t) &= -\tilde{\mathbf{I}}(\xi(\theta_t))^{-1} \nabla_\xi \tilde{L}(\xi(\theta_t)) dt = -\tilde{\mathbf{I}}(\xi_t)^{-1} \nabla_\xi \tilde{L}(\xi_t) dt. \end{aligned}$$

What we have shown is that under  $\xi_t = \xi(\theta_t)$ ,  $\xi(\theta_{t+dt}) = \xi_{t+dt}$ . Therefore, if  $\xi_0 = \xi(\theta_0)$ , we have that  $\xi_t = \xi(\theta_t)$ .

In the over-parametrization case,  $\mathbf{J}_\xi(\theta) \in \mathbb{R}^{q \times p}$  is a non-square matrix. For simplicity of derivation, abbreviate  $B := \mathbf{J}_\xi(\theta) \in \mathbb{R}^{q \times p}$ . We have

$$\begin{aligned} d\theta_t &= \theta_{t+dt} - \theta_t = -\mathbf{I}(\theta_t)^{-1} \nabla_{\theta} L(\theta_t) dt \\ &= -[B^T \tilde{\mathbf{I}}(\xi) B]^{-1} B^T \nabla_{\xi} \tilde{L}(\xi(\theta_t)) dt \\ B(\theta_{t+dt} - \theta_t) &= -B [B^T \tilde{\mathbf{I}}(\xi) B]^{-1} B^T \tilde{L}(\xi(\theta_t)) dt. \end{aligned}$$

Via the Sherman-Morrison-Woodbury formula

$$\left[ I_q + \frac{1}{\epsilon} \tilde{\mathbf{I}}(\xi)^{1/2} B B^T \tilde{\mathbf{I}}(\xi)^{1/2} \right]^{-1} = I_q - \tilde{\mathbf{I}}(\xi)^{1/2} B (\epsilon I_p + B^T \tilde{\mathbf{I}}(\xi) B)^{-1} B^T \tilde{\mathbf{I}}(\xi)^{1/2}$$

Denoting  $\tilde{\mathbf{I}}(\xi)^{1/2} B B^T \tilde{\mathbf{I}}(\xi)^{1/2} = U \Lambda U^T$ , we have that  $\text{rank}(\Lambda) \leq p < q$ . Therefore, the LHS as

$$\begin{aligned} \left[ I_q + \frac{1}{\epsilon} \tilde{\mathbf{I}}(\xi)^{1/2} B B^T \tilde{\mathbf{I}}(\xi)^{1/2} \right]^{-1} &= U \left[ I_q + \frac{1}{\epsilon} \Lambda \right]^{-1} U^T \\ \lim_{\epsilon \rightarrow 0} \left[ I_q + \frac{1}{\epsilon} \tilde{\mathbf{I}}(\xi)^{1/2} B B^T \tilde{\mathbf{I}}(\xi)^{1/2} \right]^{-1} &= U_{\perp} U_{\perp}^T \end{aligned}$$

where  $U_{\perp}$  corresponding to the space associated with zero eigenvalue of  $\tilde{\mathbf{I}}(\xi)^{1/2} B B^T \tilde{\mathbf{I}}(\xi)^{1/2}$ . Therefore taking  $\epsilon \rightarrow 0$ , we have

$$\begin{aligned} \lim_{\epsilon \rightarrow 0} \left[ I_q + \frac{1}{\epsilon} \tilde{\mathbf{I}}(\xi)^{1/2} B B^T \tilde{\mathbf{I}}(\xi)^{1/2} \right]^{-1} &= \lim_{\epsilon \rightarrow 0} I_q - \tilde{\mathbf{I}}(\xi)^{1/2} B (\epsilon I_p + B^T \tilde{\mathbf{I}}(\xi) B)^{-1} B^T \tilde{\mathbf{I}}(\xi)^{1/2} \\ &\quad \tilde{\mathbf{I}}(\xi)^{-1/2} U_{\perp} U_{\perp}^T \tilde{\mathbf{I}}(\xi)^{-1/2} = \tilde{\mathbf{I}}(\xi)^{-1} - B (B^T \tilde{\mathbf{I}}(\xi) B)^{-1} B^T \end{aligned}$$

where only the last step uses the fact  $\tilde{\mathbf{I}}(\xi)$  is invertible. Therefore

$$\begin{aligned} \xi(\theta_{t+dt}) - \xi(\theta_t) &= B(\theta_{t+dt} - \theta_t) \\ &= -B [B^T \mathbf{I}_n(\xi) B]^{-1} B^T \nabla_{\xi} \tilde{L}(\xi) dt \\ &= -\eta \mathbf{I}(\xi)^{-1/2} (I_d - U_{\perp} U_{\perp}^T) \mathbf{I}(\xi)^{-1/2} \nabla_{\xi} \tilde{L}(\xi) dt \\ &= \mathbf{I}(\xi)^{-1/2} (I_d - U_{\perp} U_{\perp}^T) \mathbf{I}(\xi)^{1/2} \left\{ \mathbf{I}(\xi)^{-1} \nabla_{\xi} \tilde{L}(\xi) dt \right\} \\ &= M_t (\xi_{t+dt} - \xi_t). \end{aligned}$$

The above claim asserts that in the over-parametrized setting, running natural gradient in the over-parametrized space is nearly ‘‘invariant’’ in the following sense: if  $\xi(\theta_t) = \xi_t$ , then

$$\begin{aligned} \xi(\theta_{t+dt}) - \xi(\theta_t) &= M_t (\xi_{t+dt} - \xi_t) \\ M_t &= \mathbf{I}(\xi_t)^{-1/2} (I_q - U_{\perp} U_{\perp}^T) \mathbf{I}(\xi_t)^{1/2} \end{aligned}$$

and we know  $M_t$  has eigenvalue either 1 or 0. In the case when  $p = q$  and  $\mathbf{J}_\xi(\theta)$  has full rank, it holds that  $M_t = I$  is the identity matrix, reducing the problem to the re-parametrized case.  $\square$

## B Experimental details

In the realistic  $K$ -class classification context there is no activation function on the  $K$ -dimensional output layer of the network ( $\sigma_{L+1}(x) = x$ ) and we focus on ReLU activation  $\sigma(x) = \max\{0, x\}$  for the intermediate layers. The loss function is taken to be the cross entropy  $\ell(y', y) = -\langle e_y, \log g(y') \rangle$ , where  $e_y \in \mathbb{R}^K$  denotes the one-hot-encoded class label and  $g(z)$  is the softmax function defined by,

$$g(z) = \left( \frac{\exp(z_1)}{\sum_{k=1}^K \exp(z_k)}, \dots, \frac{\exp(z_K)}{\sum_{k=1}^K \exp(z_k)} \right)^T.$$

It can be shown that the gradient of the loss function with respect to the output of the neural network is  $\nabla \ell(f, y) = -\nabla \langle e_y, \log g(f) \rangle = g(f) - e_y$ , so plugging into the general expression for the Fisher-Rao norm we obtain,

$$\|\theta\|_{\text{fr}}^2 = (L + 1)^2 \mathbb{E}[\{\langle g(f_\theta(X)), f_\theta(X) \rangle - f_\theta(X)_Y\}^2]. \quad (\text{B.1})$$

In practice, since we do not have access to the population density  $p(x)$  of the covariates, we estimate the Fisher-Rao norm by sampling from a test set of size  $m$ , leading to our final formulas

$$\|\theta\|_{\text{fr}}^2 = (L + 1)^2 \frac{1}{m} \sum_{i=1}^m \sum_{y=1}^K g(f_\theta(x_i))_y [\langle g(f_\theta(x_i)), f_\theta(x_i) \rangle - f_\theta(x_i)_y]^2, \quad (\text{B.2})$$

$$\|\theta\|_{\text{fr,emp}}^2 = (L + 1)^2 \frac{1}{m} \sum_{i=1}^m [\langle g(f_\theta(x_i)), f_\theta(x_i) \rangle - f_\theta(x_i)_y]^2. \quad (\text{B.3})$$



B.1 Additional experiments and figures

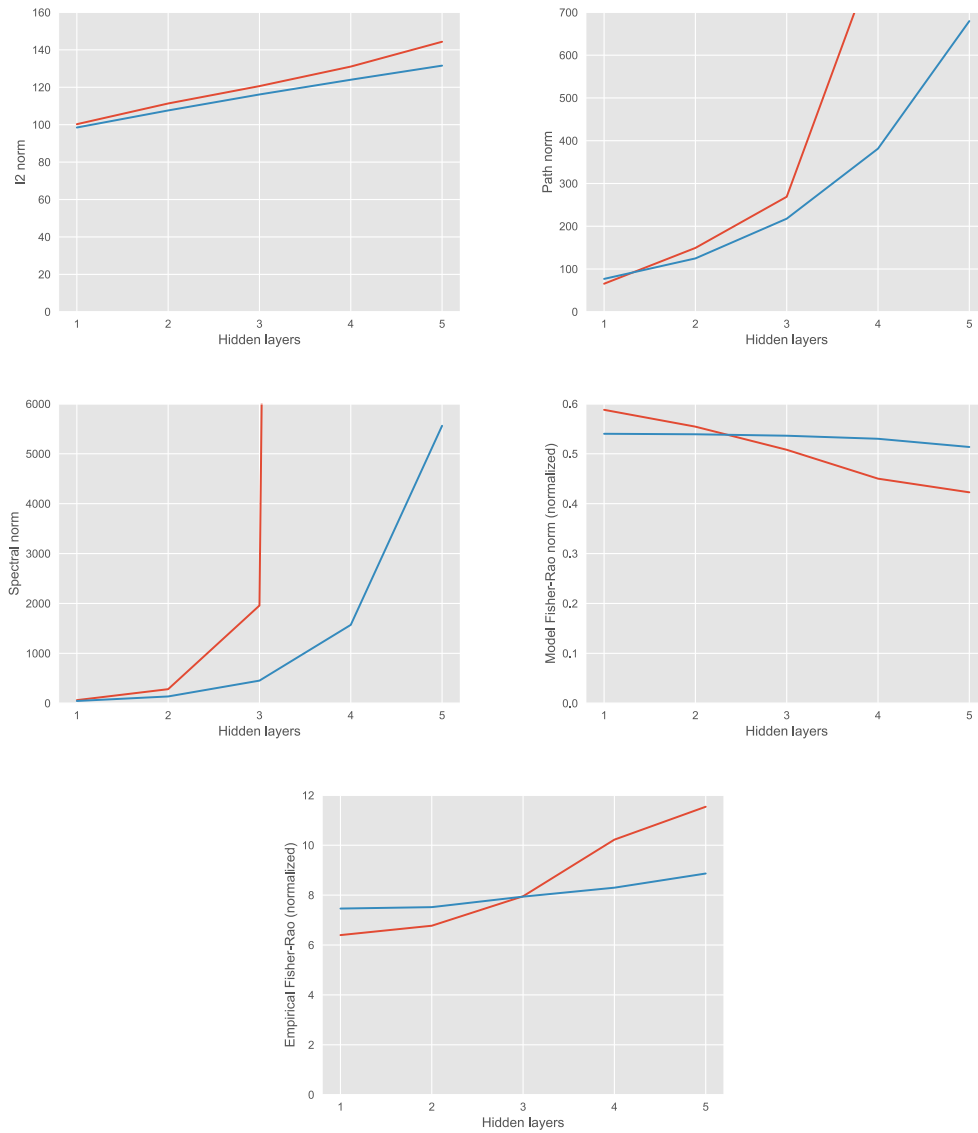

Figure 3: Dependence of different norms on depth  $L$  ( $k = 500$ ) after optimizing with vanilla gradient descent (red) and natural gradient descent (blue). The Fisher-Rao norms are normalized by  $L + 1$ .

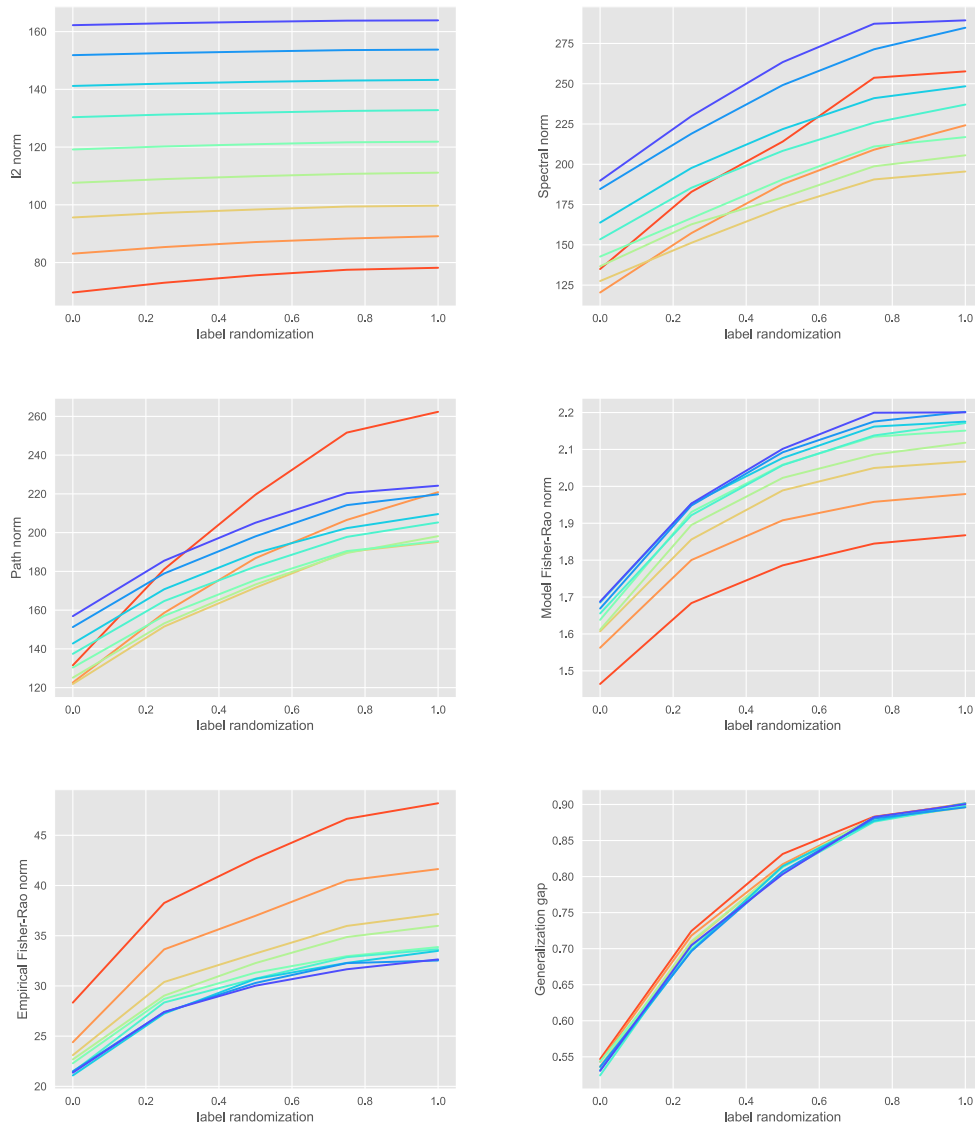

Figure 4: Dependence of capacity measures on label randomization after optimizing with natural gradient descent. The colors show the effect of varying network width from  $k = 200$  (red) to  $k = 1000$  (blue) in increments of 100. The natural gradient optimization clearly distinguishes the network architectures according to their Fisher-Rao norm.

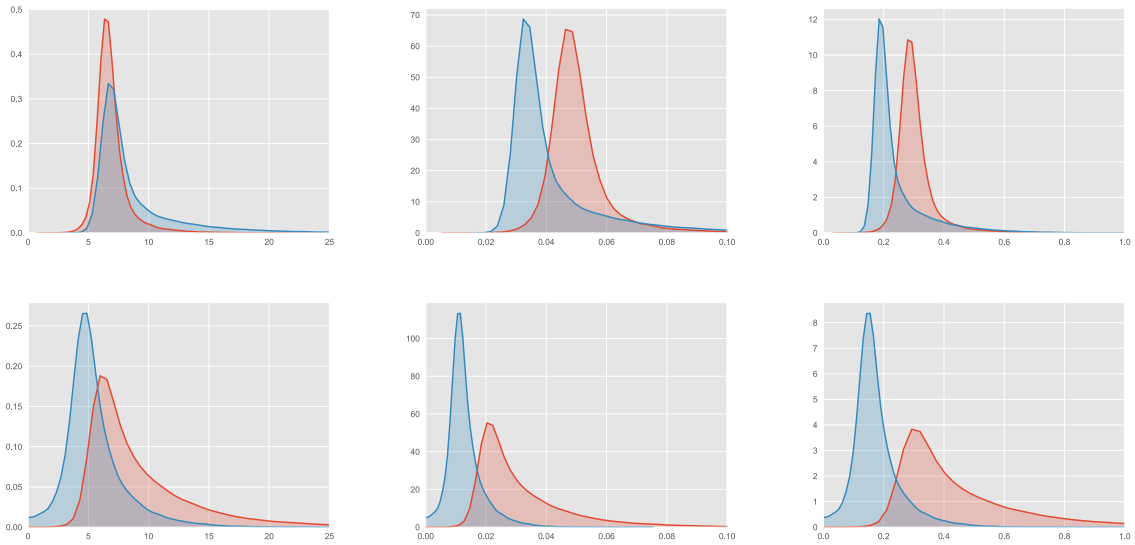

Figure 5: Distribution of margins found by natural gradient (top) and vanilla gradient (bottom) before rescaling (left) and after rescaling by spectral norm (center) and empirical Fisher-Rao norm (right).

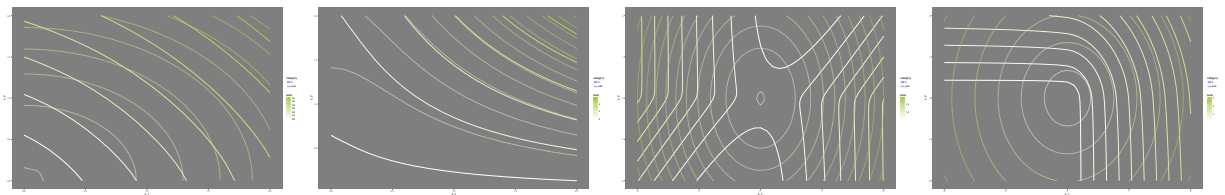

Figure 6: The levelsets of Fisher-Rao norm (solid) and path-2 norm (dotted). The color denotes the value of the norm.

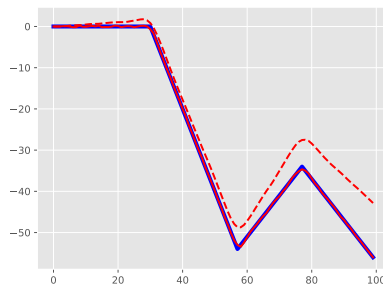

Figure 7: Reproduction of conditioning experiment from [16] after  $10^4$  iterations of Adam (dashed) and K-FAC (red).
